# Supplementary material
Source: PubMed Central journal article supplement (PMC2864789)

## Supplemental Data

UV treatments were superimposed onto white light supplied by four Sylvania cool white 4 ft. fluorescent tubes (F340W/SS/Eco). UVA radiation was supplied by one 2 ft. Phillips Blacklight (T120W/08RS) with a peak irradiance at 366 nm. UVB was supplied by one or two 2 ft. UBL FS20T12/UVB tube with peak irradiance at 310 nm (National Biological Corp., Beachwood, OH, USA). UV intensities were measured using an OL 756 UV-VIS spectroradiometer (Optronic Laboratories, Orlando FL, USA).

UV intensities are reported as  $W/m^2$ , and total applied energy as  $kJ/m^2$ , unweighted by any action spectrum. Some previous investigators (Hakkinen *et al.* 2004; Vehniainen *et al.* 2003) have used CIE weighting for human erythema [originally published by (McKinlay and Diffey 1987)]. Applying this weighting factor to our data produces an approximately 4.7-fold decrease in the reported total irradiation; thus, for our initial study using both UVB and UVA bulbs, the reported CIE-weighted dose would be 2.5, 4.9, and 7.3  $kJ/m^2$  for 4, 8, and 12 hours of total irradiation respectively, as compared to 2.8 and 5.4  $kJ/m^2$  in (Vehniainen *et al.* 2003). Vehniainen *et al.* also observed a UV-stimulated induction of CYP1A (see Discussion). To facilitate comparisons to other studies we have not used this action spectrum to convert our irradiance data.

## References

- Hakkinen, J., Vehniainen, E., and Oikari, A. (2004). High sensitivity of northern pike larvae to UV-B but no UV-photoinduced toxicity of retene. *Aquatic Toxicology* **66**, 393-404.
- McKinlay, A. F., and Diffey, B. L. (1987). A reference action spectra for ultraviolet induced erythema in human skin. In *Human exposure to ultraviolet radiation: risks and regulations* (W. R. Passchier and B. M. F. Bosnjakovich, eds.), pp. 83–87. Elsevier, Amsterdam.

Vehniainen, E. R., Hakkinen, J., and Oikari, A. (2003). Photoinduced lethal and sublethal toxicity of retene, a polycyclic aromatic hydrocarbon derived from resin acid, to coregonid larvae. *Environ Toxicol Chem* **22**, 2995-3000.

**Supplemental Figure 1.** Spectral irradiance (W/m<sup>2</sup>/nm) for the UVB+UVA irradiation experiment, with one UVA bulb, one UVB bulb, and 4 white bulbs. (A) Spectral irradiance, inset is the region from 280-400 nm. (B) Spectral irradiance weighted by the CIE human erythral action spectrum. Note scale change.

**Supplemental Figure 2.** Spectral irradiance for the enhanced UVB experiments (two UVB bulbs). (A) Spectral irradiance 250-400 nm. (B) Spectral irradiance weighted by the CIE human erythral action spectrum.

# Supplemental Figure 1

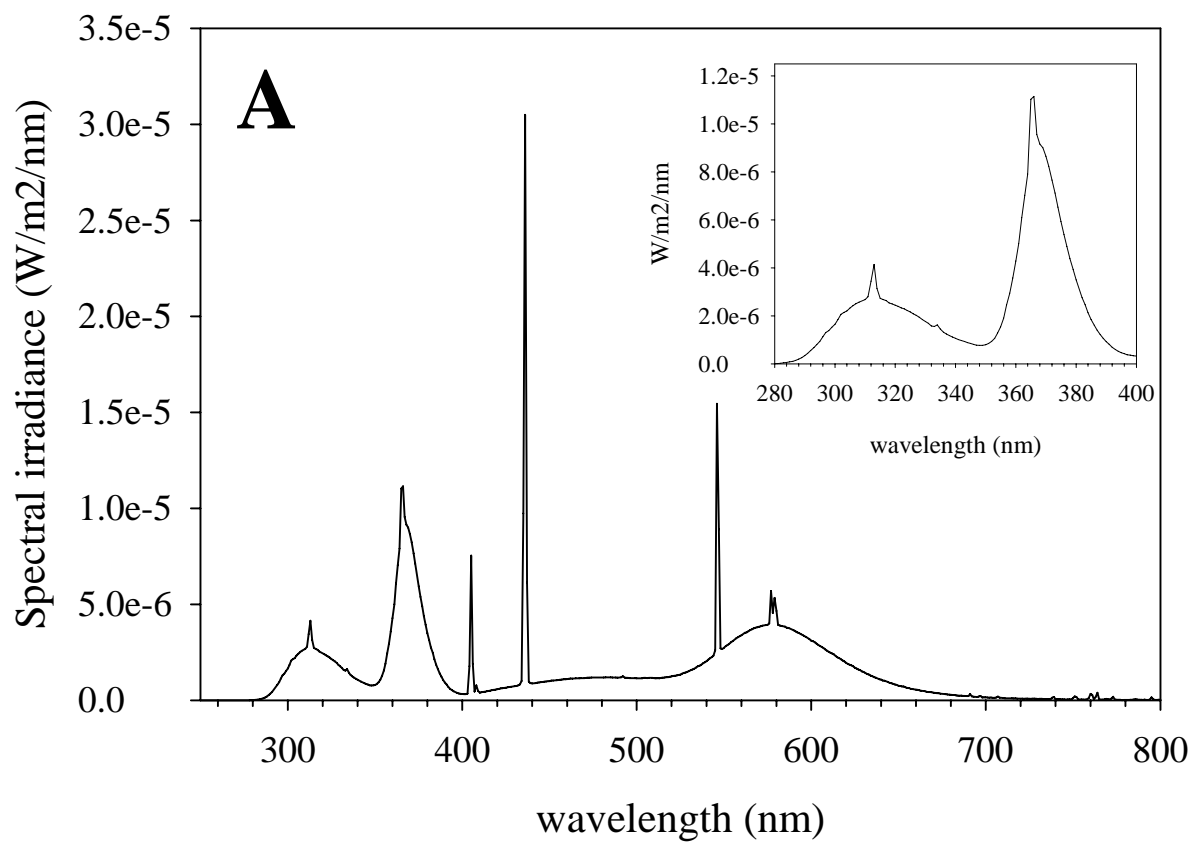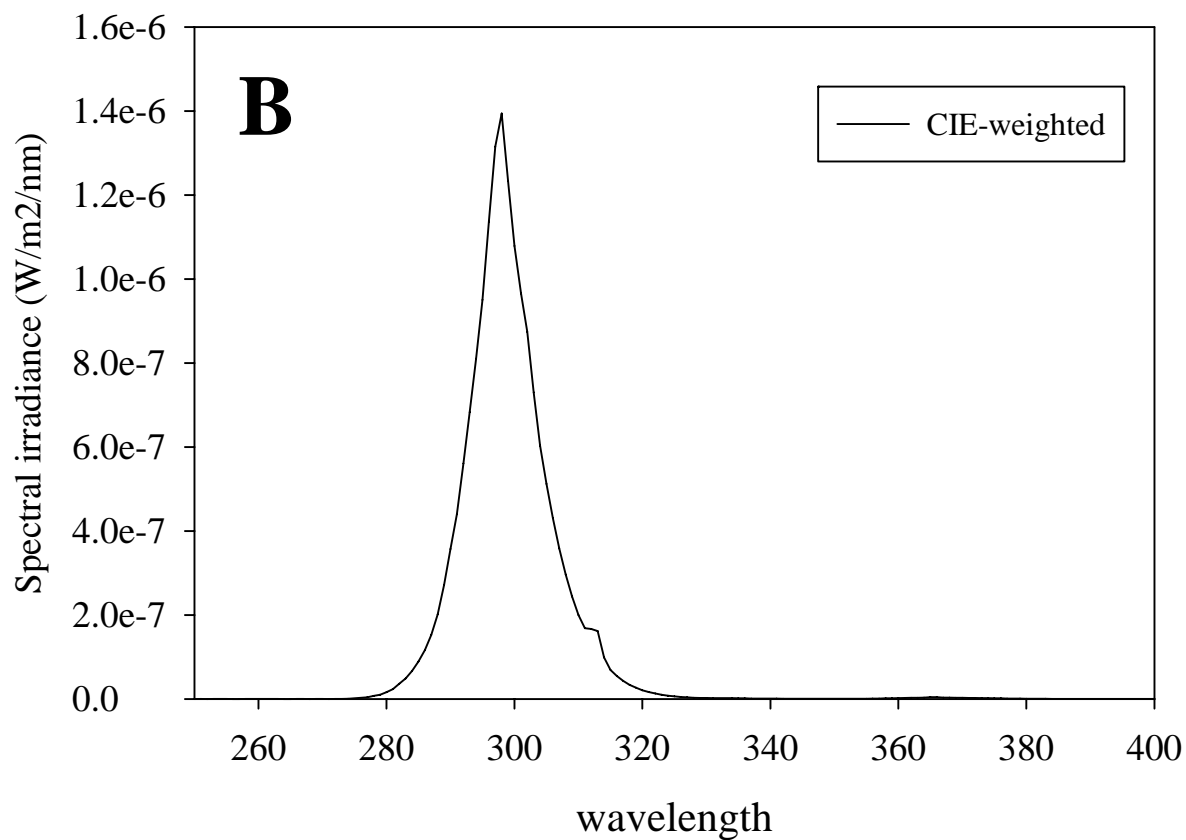

# Supplemental Figure 2

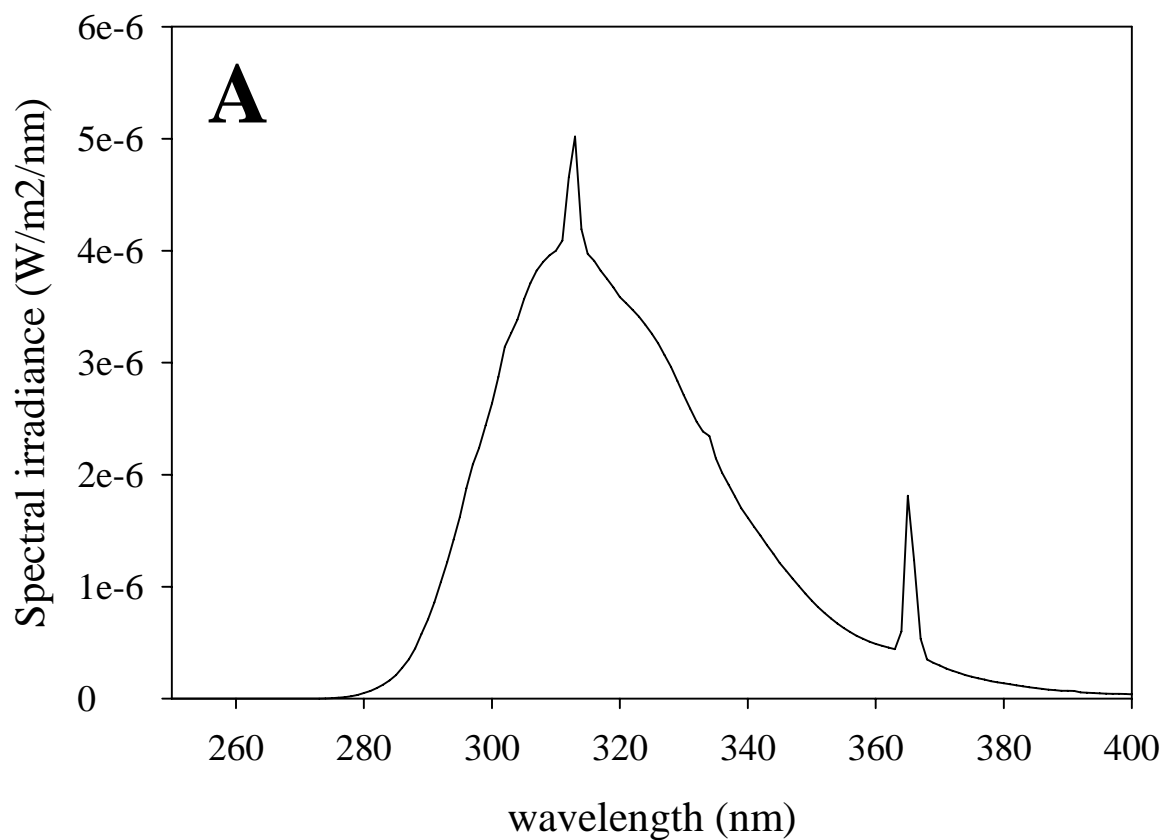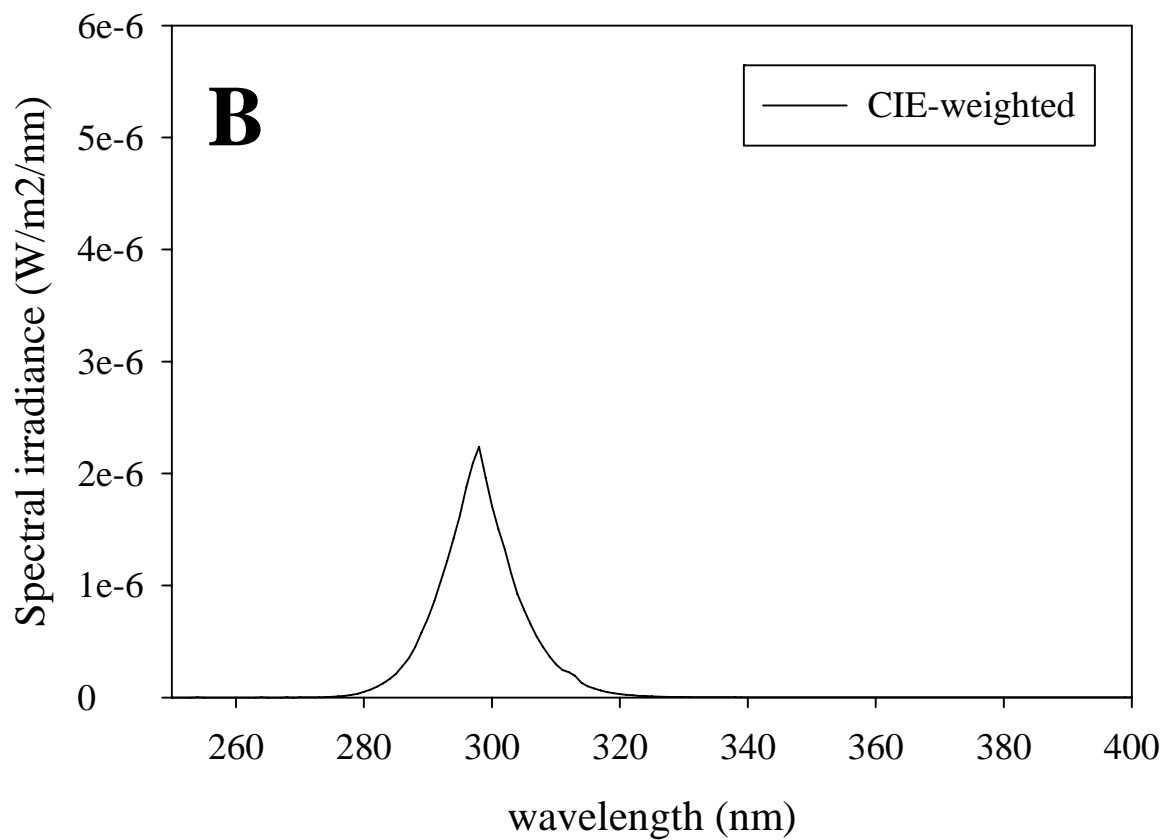

Supplement: NIHMS176609-supplement-01.pdf [file NIHMS176609-supplement-01.pdf]
